# Supplementary material
Source: PubMed Central journal article supplement (PMC7482410)

# **SUPPORTING INFORMATION**

## **Elucidating the molecular interactions of chemokine CCL2 orthologs with flavonoid baicalin**

**Nidhi Joshi<sup>1</sup>, Dinesh Kumar<sup>2</sup> and Krishna Mohan Poluri<sup>1\*</sup>**

<sup>1</sup>Department of Biotechnology, Indian Institute of Technology Roorkee,  
Roorkee – 247667, Uttarakhand, India

<sup>2</sup>Centre of Biomedical Research, SGPGIMS Campus, Lucknow - 226014, Uttar Pradesh,  
India

**Running Title: Interaction of baicalin with CCL2 chemokines**

**\*Corresponding Author:**

Dr. Krishna Mohan Poluri,  
Department of Biotechnology,  
Indian Institute of Technology Roorkee (IIT-Roorkee),  
Roorkee – 247667, Uttarakhand, India  
Tel: +91-1332-284779;  
E-mail: [krishfbt@iitr.ac.in](mailto:krishfbt@iitr.ac.in) / [mohanpmk@gmail.com](mailto:mohanpmk@gmail.com)

**Table S1:** List of primers used for site directed mutagenesis of mCCL2-P8A and hCCL2-P8A mutant proteins.

---

| Name of Mutant   | Primer Sequence                                                                                          |
|------------------|----------------------------------------------------------------------------------------------------------|
| <b>mCCL2-P8A</b> | <b>Fwd: 5'- GATGCAGTTAACGCCGCACTCACCTGCTGC -3'</b><br><b>Rev: 5'- GCAGCAGGTGAGTGCGGCGTTAACTGCATC -3'</b> |
| <b>hCCL2-P8A</b> | <b>Fwd: 5'- GCAATCAATGCCGCGAGTCACCTGCTG -3'</b><br><b>Rev: 5'- CAGCAGGTGACTGCGGCATTGATTGC -3'</b>        |

---

**Table S2:** Total amount of protein obtained for mCCL2-P8A and hCCL2-P8A after each step of purification.

---

| <b>Purification steps</b>                                        | <b>mCCL2-P8A</b>  |
|------------------------------------------------------------------|-------------------|
| After 1 <sup>st</sup> Ni-NTA column chromatography               | 65 ± 5            |
| After Dialysis                                                   | 50 ± 5            |
| After ion-exchange chromatography                                | 25 ± 3            |
| After reverse Ni NTA chromatography                              | 10 ± 2            |
| <b>Total mCCL2-P8A protein obtained after final purification</b> | <b>8 ± 2 mg/L</b> |

---

---

| <b>Purification steps</b>                                        | <b>hCCL2-P8A</b>  |
|------------------------------------------------------------------|-------------------|
| After 1 <sup>st</sup> Ni-NTA column chromatography               | 60 ± 5            |
| After Dialysis                                                   | 45 ± 5            |
| After ion-exchange chromatography                                | 18 ± 3            |
| After reverse Ni NTA chromatography                              | 8 ± 2             |
| <b>Total hCCL2-P8A protein obtained after final purification</b> | <b>6 ± 2 mg/L</b> |

---

**Table S3:** Percentage of secondary structural elements in CCL2 wild type and monomeric proteins (for both human and murine orthologs) as estimated using DICHROWEB-K2D software.

| <b>Protein</b>   | <b>Helix (%)</b> | <b>Sheet (%)</b> | <b>Coil (%)</b> |
|------------------|------------------|------------------|-----------------|
| <b>mCCL2-WT</b>  | <b>17.3</b>      | <b>14.6</b>      | <b>68.1</b>     |
| <b>hCCL2-WT</b>  | <b>17.2</b>      | <b>14.9</b>      | <b>67.9</b>     |
| <b>mCCL2-P8A</b> | <b>17.9</b>      | <b>14.6</b>      | <b>67.5</b>     |
| <b>hCCL2-P8A</b> | <b>17.8</b>      | <b>14.8</b>      | <b>67.4</b>     |

**Figure S1:** Multiple sequence alignment of CCL2 chemokine from rodent and primate families. The sequence alignment was generated from CLUSTAL W software. The secondary structural elements are shown on the top of the sequences and the presence of  $\beta$ c-stand at C terminal, which is specifically observed in murine family is represented in cyan color.

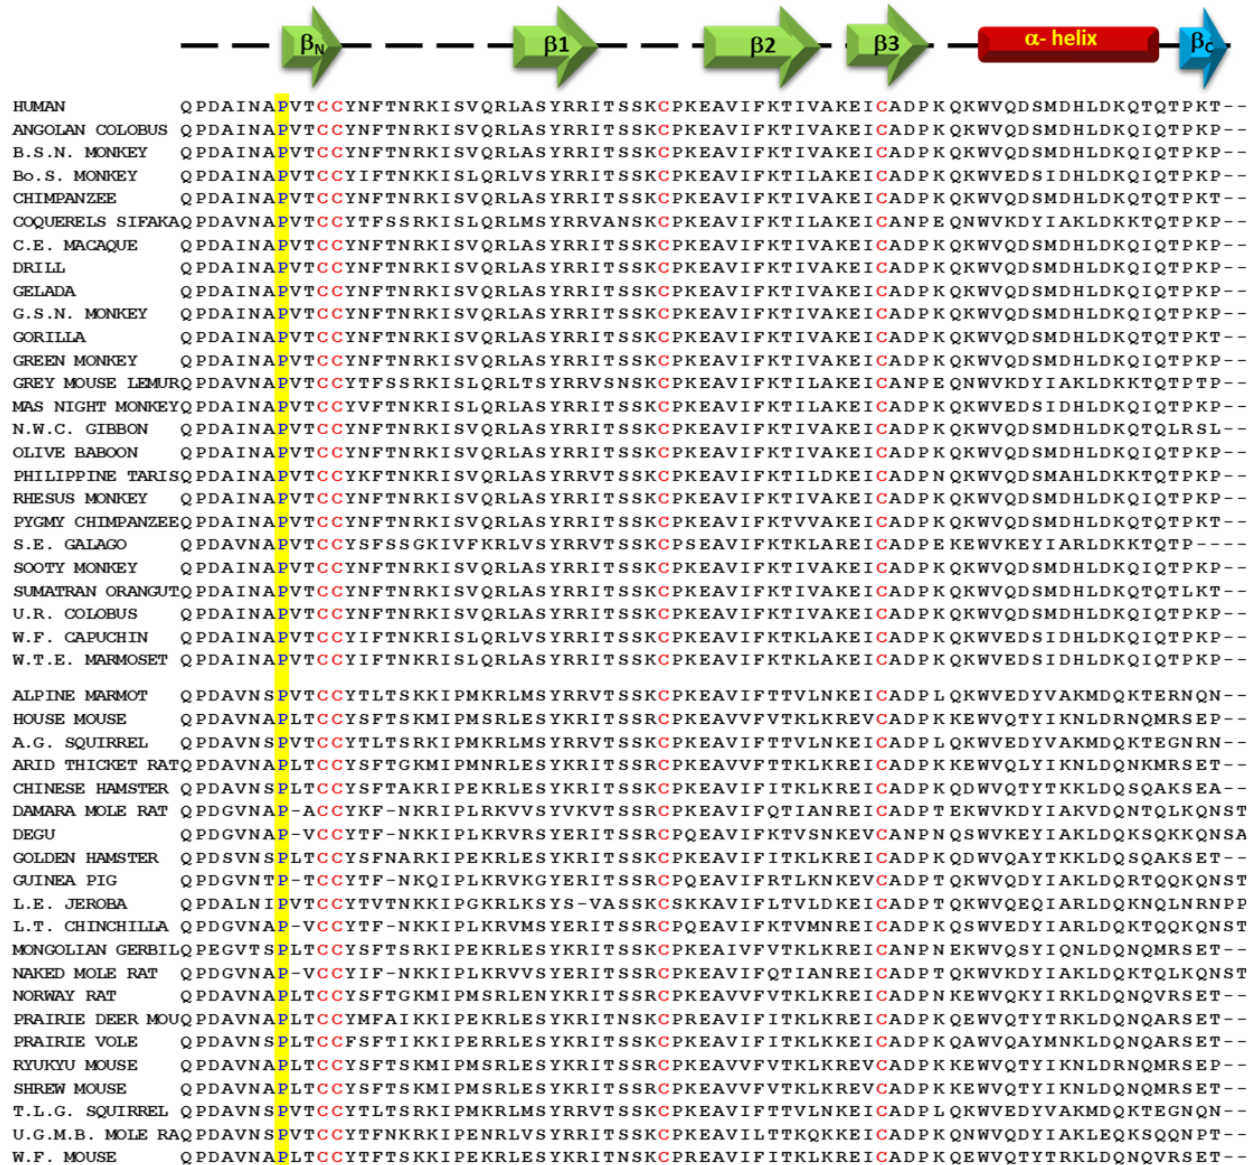

**Figure S2:** (A) Site directed mutagenesis; Lane M - DNA marker; Lane 2- mCCL2-P8A mutant gene; Lane 3- hCCL2-P8A mutant gene. (B) Protein overexpression profile: Lane M- Marker (Bovine serum albumin (BSA)-66 kDa and hen egg lysozyme (HEL)-14 kDa); Lane 2- uninduced sample of mCCL2-P8A protein; Lane 3- induced sample of mCCL2-P8A protein. (C) Ni-NTA affinity chromatography profile: Lane M- marker; Lane 2 – supernatant obtained after lysis, Lane 3 – flow through; Lane 4 and 5 - wash I (20 mM imidazole + 20 mM Tris + 500 mM NaCl), wash II (50 mM imidazole + 20 mM Tris + 500 mM NaCl); and Lane 6-9 - Elution fractions (400 mM imidazole + 20 mM Tris + 500 mM NaCl) having purified fusion mCCL2-P8A protein. (D) TEV digestion profile: Lane M – marker; Lane 2 - undigested mCCL2- protein; Lane 3 - digested mCCL2-P8A protein containing the left over undigested protein, thioredoxin tag, and mCCL2-P8A protein. (E) Ion-exchange chromatography profile for tag (TRX) separation: Lane M-marker; Lane 2- supernatant (collected after TEV digestion); Lane 3- flow through; Lane 4-5 - wash I (50 mM NaCl + 20 mM Tris), wash II (100 mM NaCl + 20 mM Tris); Lane 6-8- Elution fractions (500 mM NaCl + 20 mM Tris) having purified mCCL2-P8A protein. (F) Reverse Ni-NTA affinity chromatography profile: Lane M – Marker; Lane 2- pure mCCL2-P8A protein (MW-9 kDa).

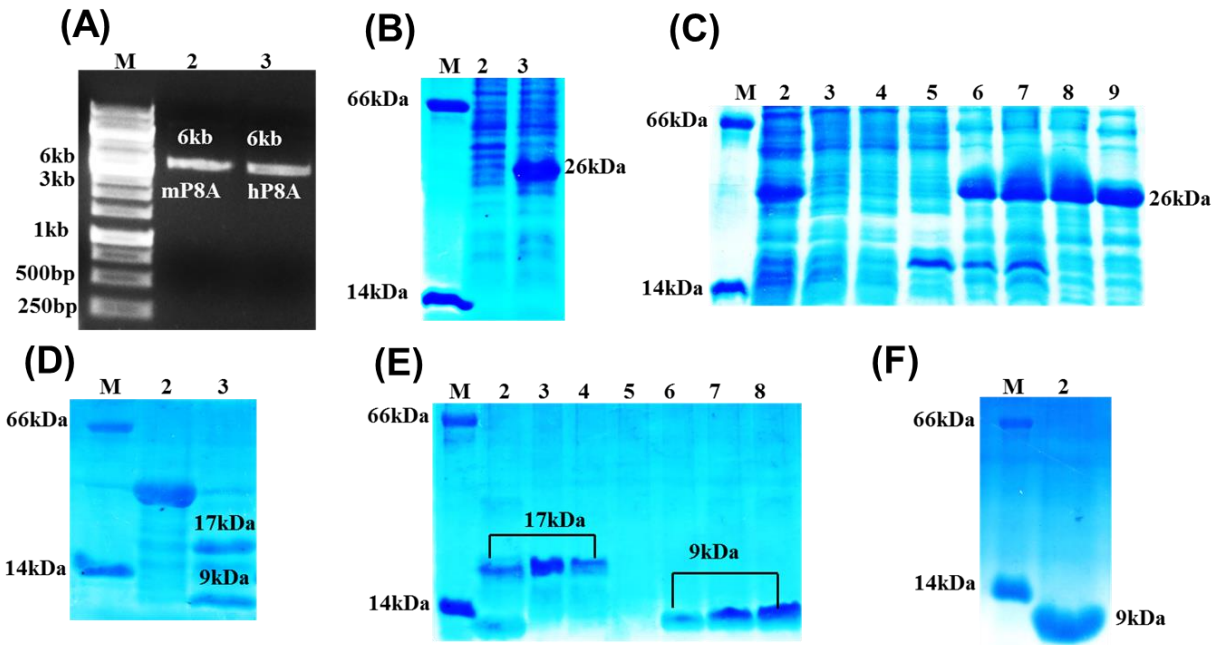

**Figure S3:** (A) Protein overexpression profile for hCCL2-P8A mutant: Lane M- Marker (Bovine serum albumin (BSA) – 66 kDa and hen egg lysozyme (HEL)-14 kDa); Lane 2- uninduced sample of hCCL2-P8A protein; Lane 3- induced sample of hCCL2-P8A protein. (B) Ni-NTA affinity chromatography profile: Lane M- marker; Lane 2 - supernatant obtained after lysis, Lane 3 - flow through; Lane 4 and 5 - wash I (20 mM imidazole + 20 mM Tris + 500 mM NaCl), wash II (50 mM imidazole + 20 mM Tris + 500 mM NaCl); and Lane 6-9 - Elution fractions (400 mM imidazole + 20 mM Tris + 500 mM NaCl) having purified fusion hCCL2-P8A protein. (C) TEV digestion profile: Lane M - marker; Lane 2 - undigested monomeric protein; Lane 3 - digested hCCL2-P8A protein containing the left over undigested protein, thioredoxin tag, and hCCL2-P8A protein. (D) Ion-exchange chromatography profile for tag (TRX) separation: Lane M- marker; Lane 2- supernatant (collected after TEV digestion); Lane 3- flow through; Lane 4-5 - wash I (50 mM NaCl + 20 mM Tris), wash II (100 mM NaCl + 20 mM Tris); Lane 6-8 - Elution fractions (500 mM NaCl + 20 mM Tris) having purified hCCL2-P8A protein. (E) Reverse Ni-NTA affinity chromatography profile: Lane M - Marker; Lane 2 – pure hCCL2-P8A protein (MW-9 kDa).

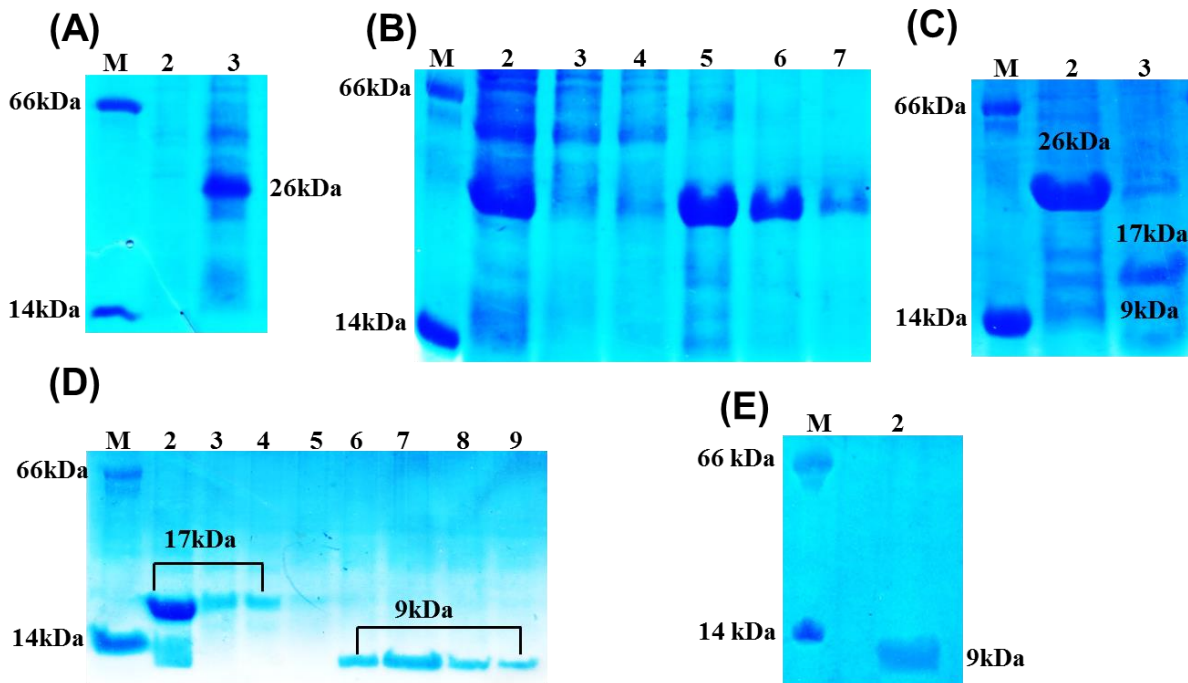

**Figure S4:** Overlay of tryptophan fluorescence of WT (mCCL2 and hCCL2) and monomeric (mCCL2-P8A and hCCL2-P8A) CCL2 orthologs.

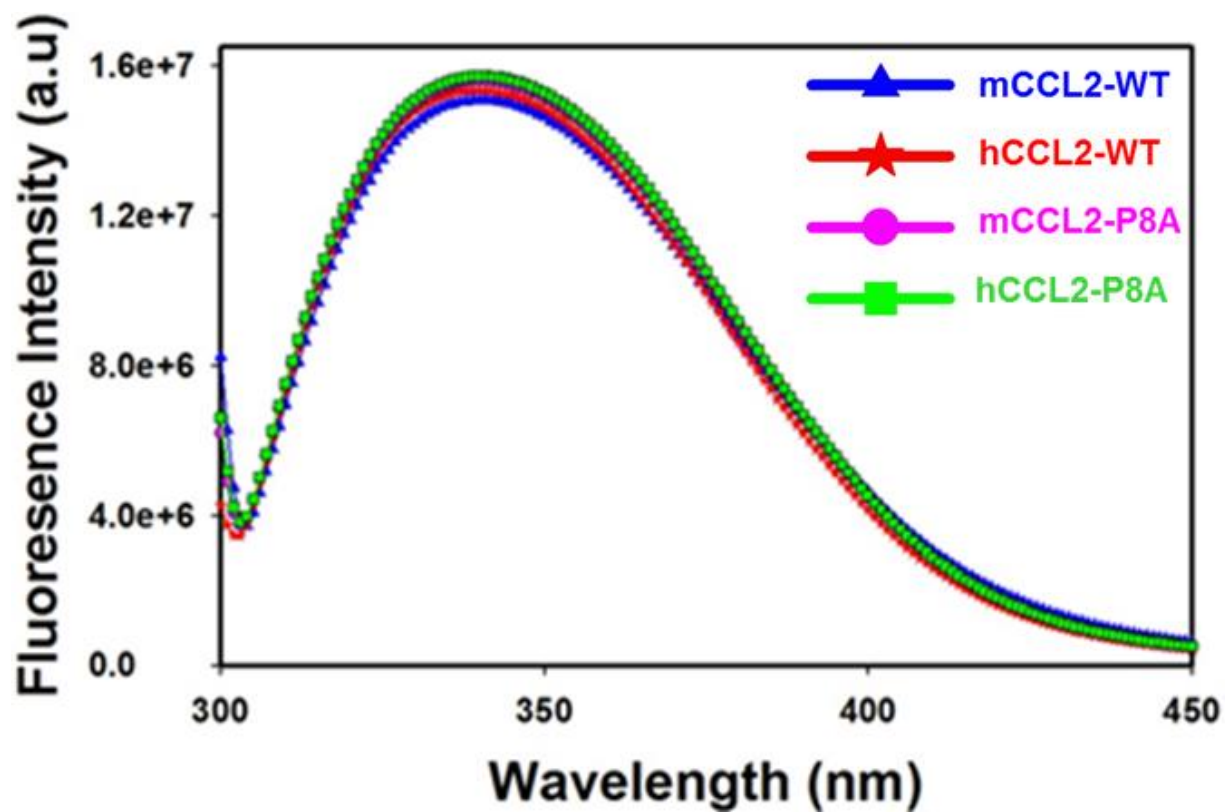



**Figure S5:** Overlay of tryptophan fluorescence lifetime decay profile of WT (mCCL2 and hCCL2) and monomeric (mCCL2-P8A and hCCL2-P8A) CCL2 orthologs.

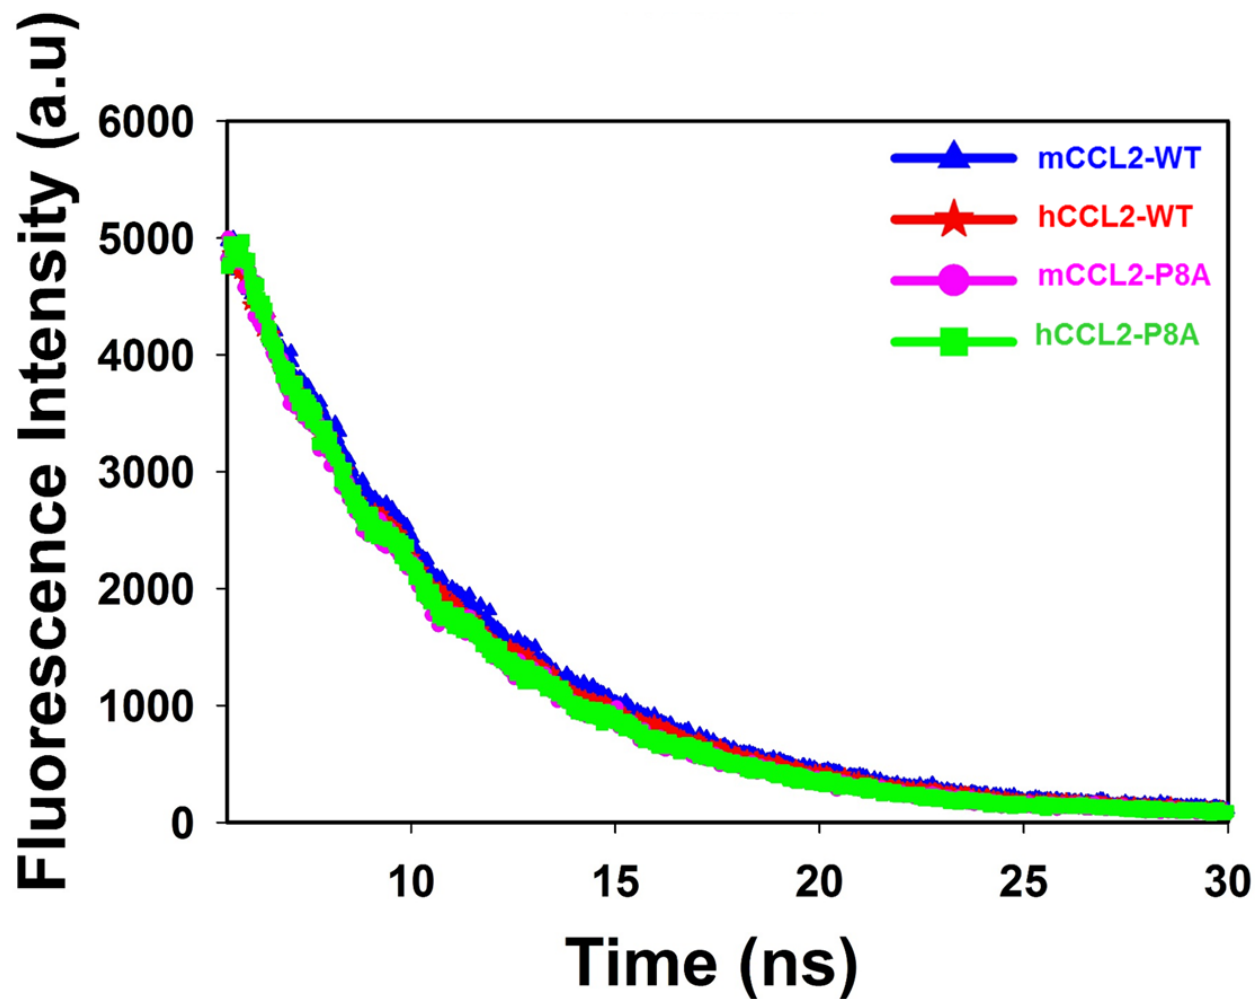

**Figure S6:**  $^{15}\text{N}$ -HSQC overlay of mCCL2-P8A at 500  $\mu\text{M}$  (blue) and 50  $\mu\text{M}$  (red) concentration.

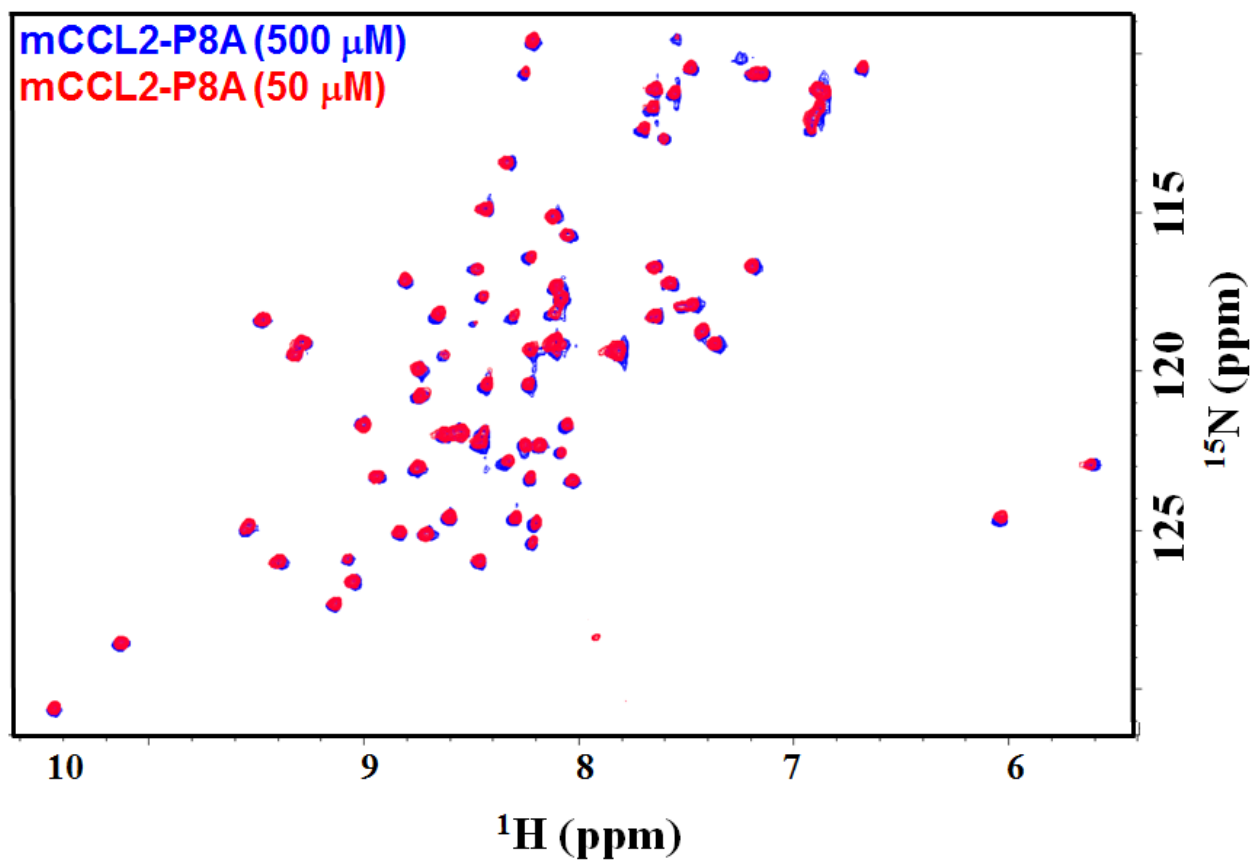

Supplement: ao0c03428_si_001.pdf [file ao0c03428_si_001.pdf]
